# Supplementary material for: Seasonal Influenza Dynamics in Korea Before and After COVID-19: Parameter Estimation using the Ensemble Kalman Filter Method
Source: Research Square preprint supplement (doi:10.21203/rs.3.rs-6497025/v1), 2025-05-13
Supplement: Supplementary file 1 [file d6aa03422587e23c9ec64716.docx]

**Supplementary materials**

Seasonal Influenza Dynamics in Korea Before and After COVID-19: Parameter Estimation using the Ensemble Kalman Filter Method

Wasim Abbas1,¶, Yeonsu Lee2,¶, Sangil Kim3,4, Hyojung Lee2,*

1Nonlinear Dynamics and Mathematical Application Center, Kyungpook National University, Daegu 41566, Republic of Korea

2Department of Statistics, Kyungpook National University, Daegu, 41566, Republic of Korea

3Department of Mathematics, Pusan National University, Pusan, 46241, Republic of Korea

4Institute for Future Earth, Pusan National University, Busan, 46241, Republic of Korea

### Ensemble Kalman Filter (EnKF) Algorithm

The Ensemble Kalman Filter (EnKF) was implemented to assimilate observed influenza incidence data into the SEIR model over discrete time steps , where is the total number of measurements. The algorithm iteratively performs forecast and update steps for an ensemble of n members, estimating the augmented state vector , where are the SEIR states and are the parameters. The observation is the incidence .

**Initialization**

- **Ensemble Size:**
- **Initial Ensemble:** For ,

, , is the column vector of estimated parameters (using 1st approach),

- **Iterative Steps (for )**

1. **Forecast Step**

- **State Propagation**: For each ensemble member ,

where, is the SEIR model solution over , is the interpolated absolute humidity, and is the process noise with covariance .

1. **Update Step**

- **Observation Forecast:** For each ,

,

where is the observation operator, and

- **Forecast Mean**: , .
- **Ensemble Deviation:**
- **Covariance Matrices**
- **Observation Noise:**  where the input observation noise covariance is at the time and with .
- **Kalman Gain:**

.

- **State Update:** For each

,

- **Posterior Mean**: , .

**
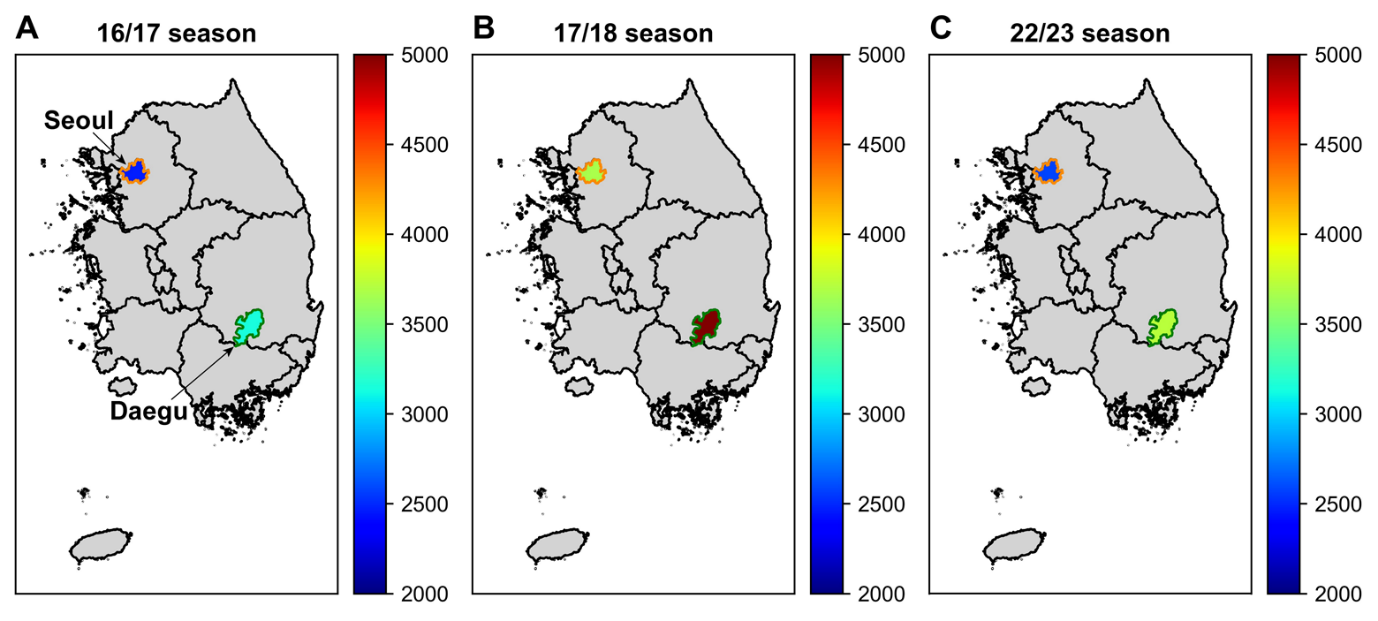
Figure S1. Cumulative influenza cases per 100,000 in Seoul and Daegu by season.** Cumulative influenza cases per 100,000 in **A** the 16/17 season, **B** the 17/18 season, and **C** the 22/23 season. The orange line represents Seoul, and the green line represents Daegu.

**
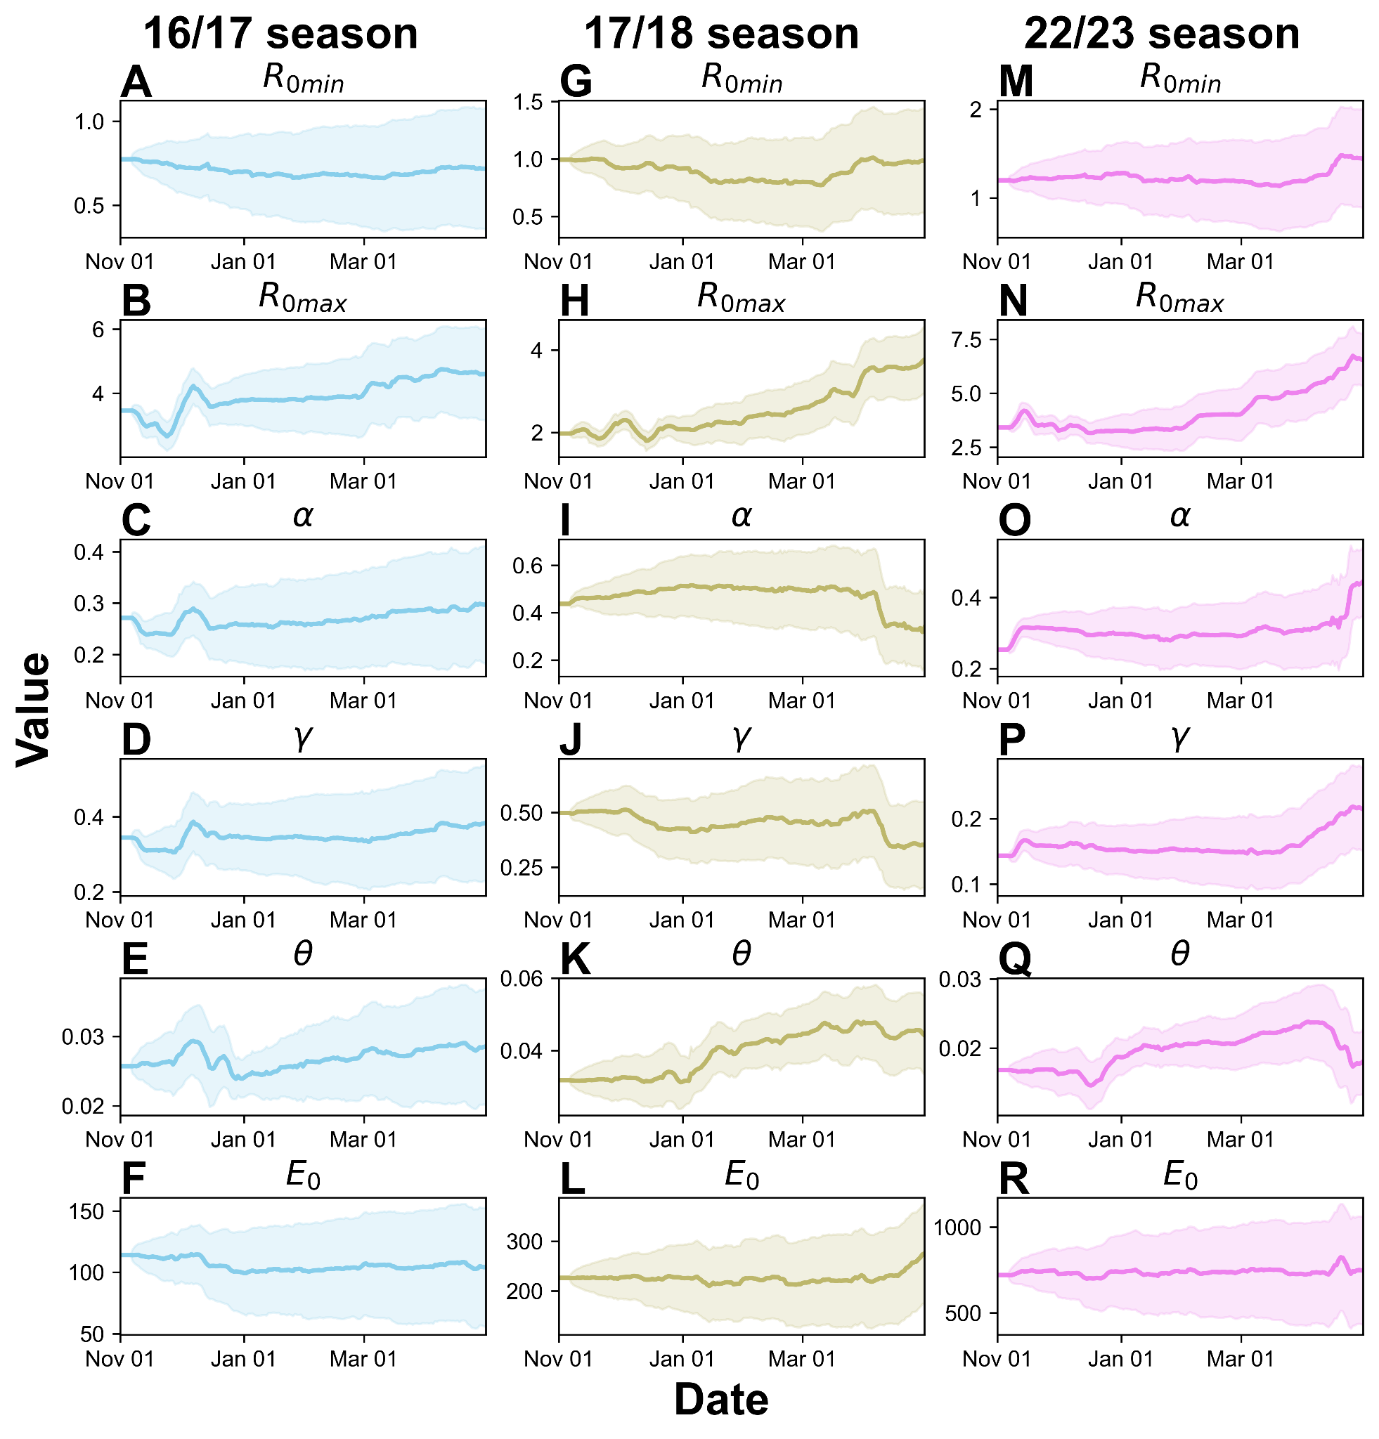
**

**Figure S2. Time-dependent estimated parameter values via EnKF in Seoul.**

**
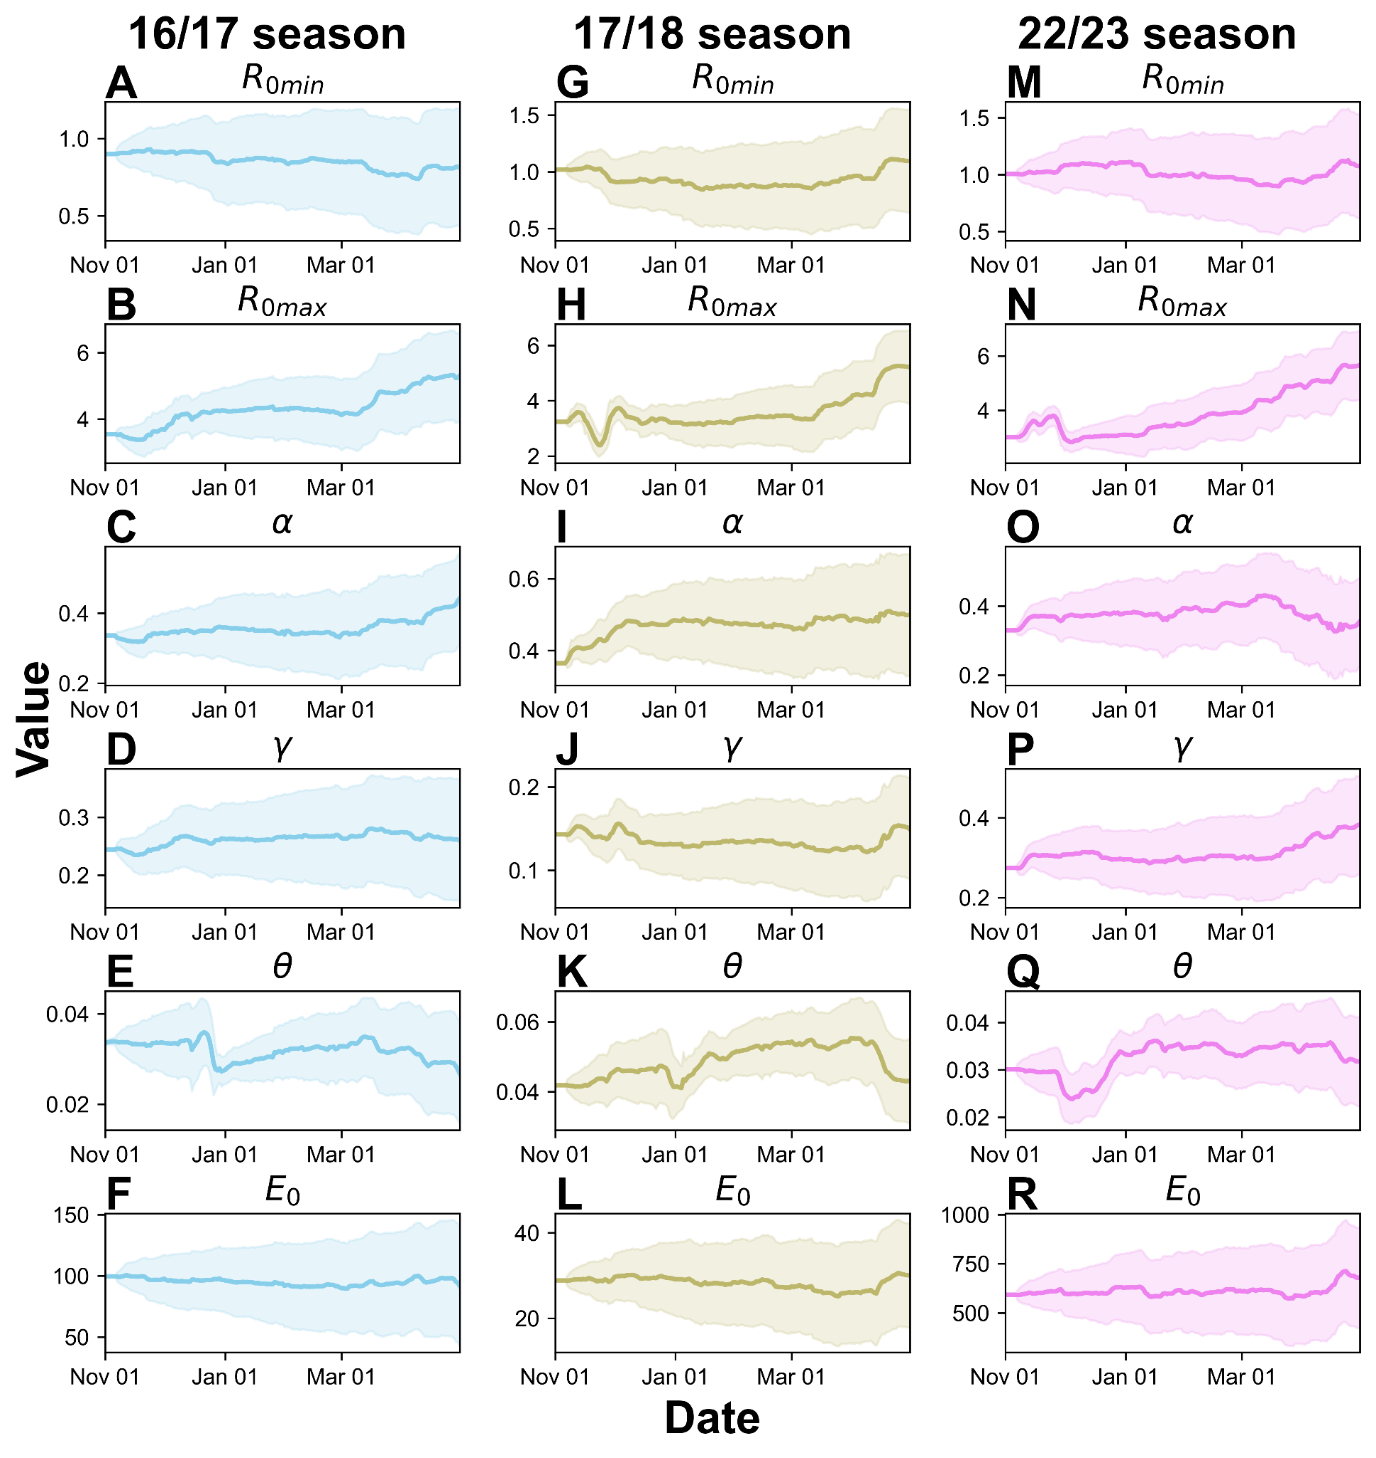
**

**Figure S3. Time-dependent estimated parameter values via EnKF in Daegu.**


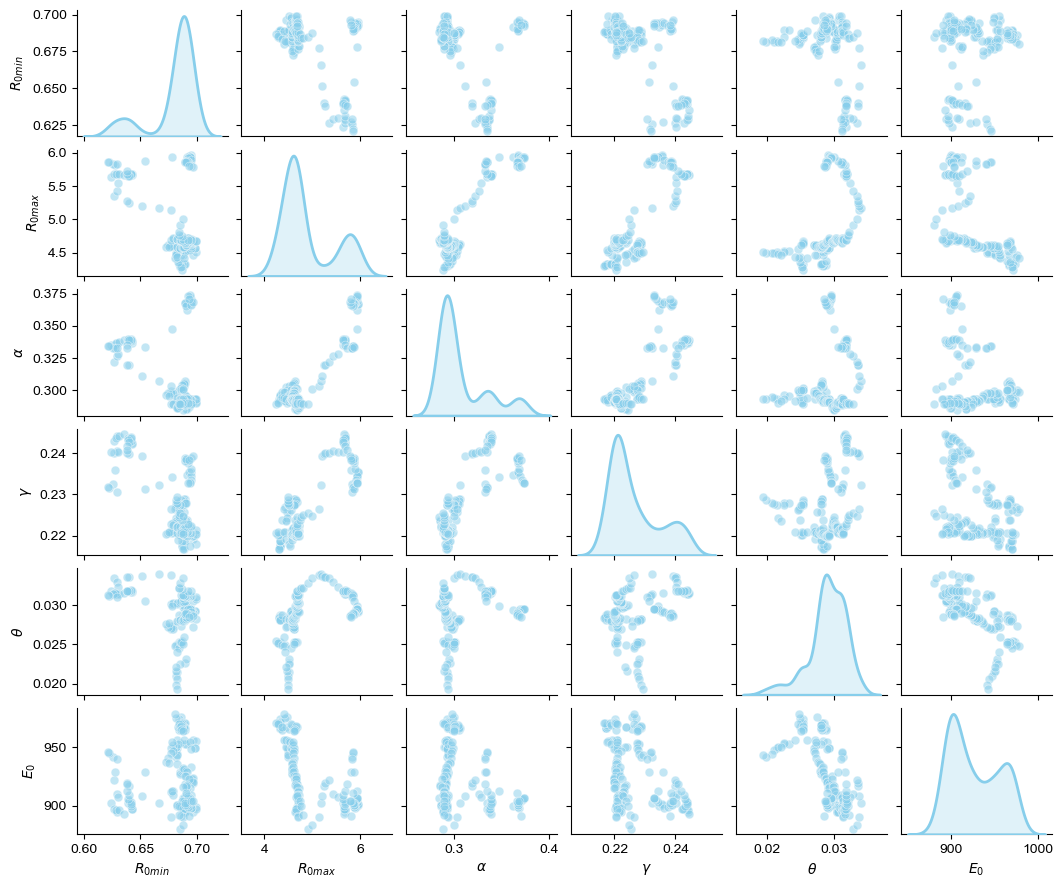


**Figure S3. Analysis of Parameter Relationships in Korea (16/17 Season)**


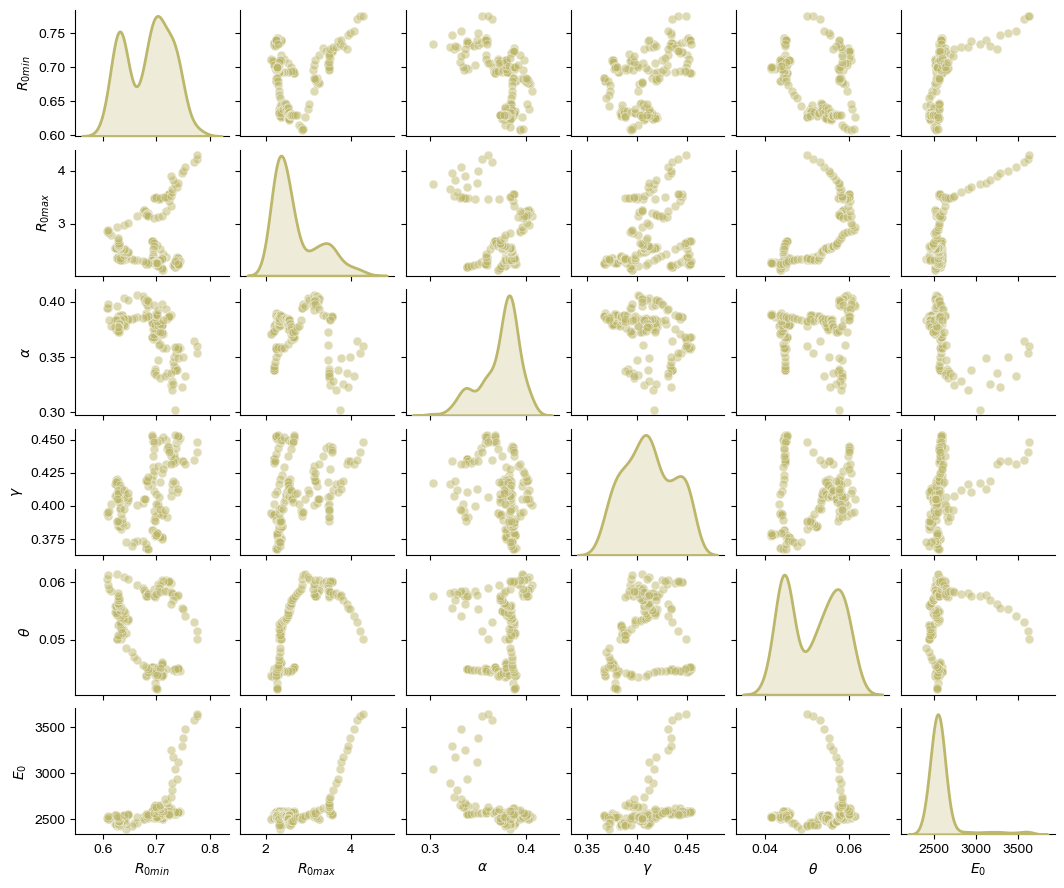


**Figure S4. Analysis of Parameter Relationships in Korea (17/18 Season)**


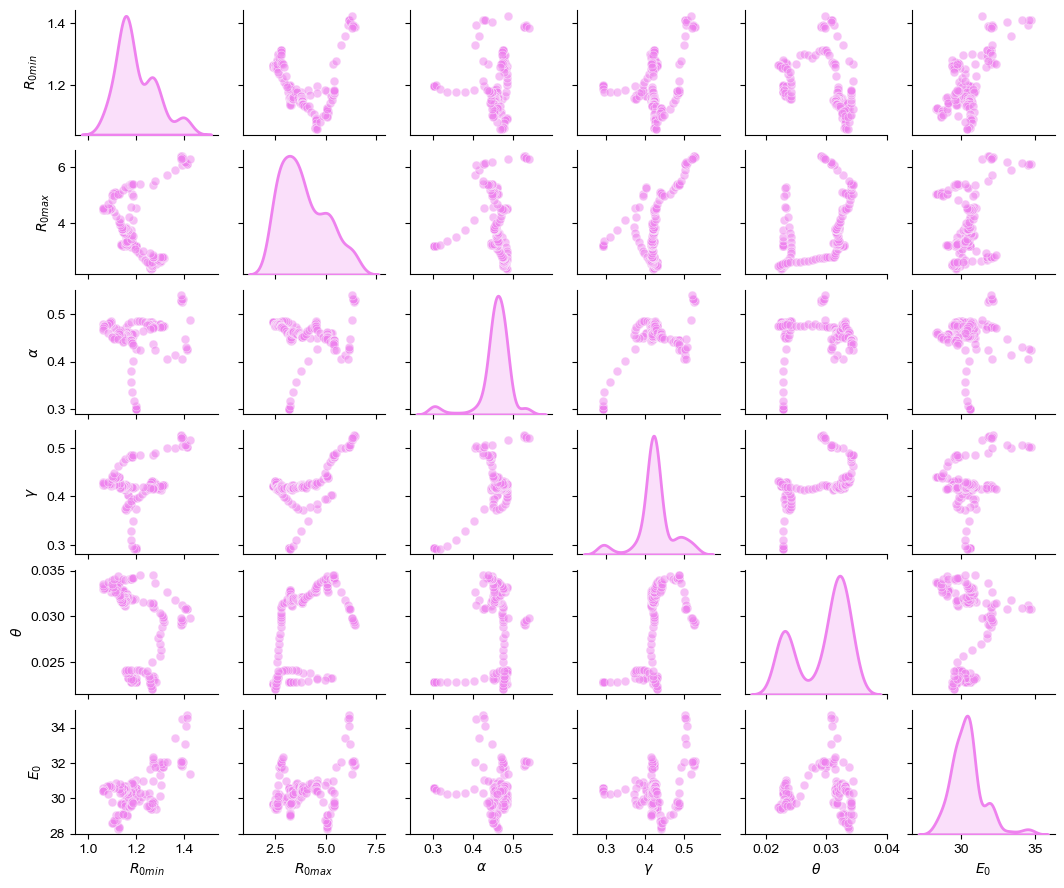


**Figure S5. Analysis of Parameter Relationships in Korea (22/23 Season)**


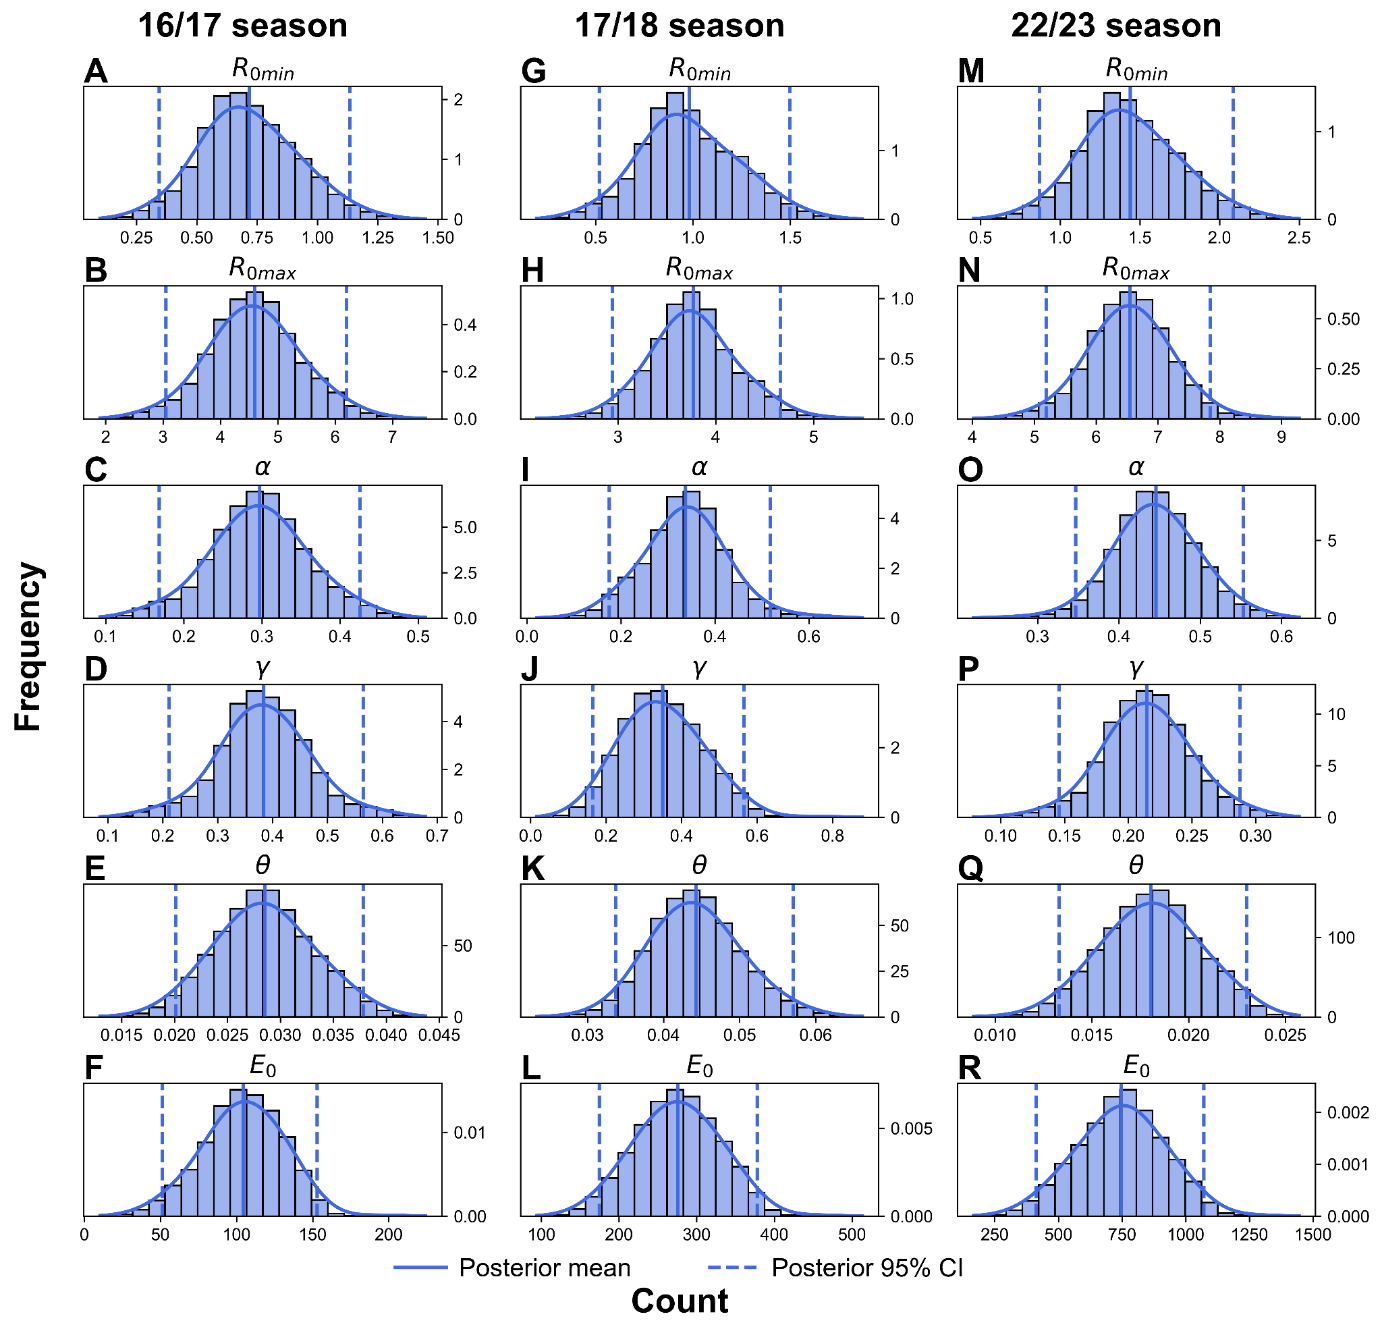
**Figure S7. Posterior distributions of parameters estimated via EnKF in Seoul.**


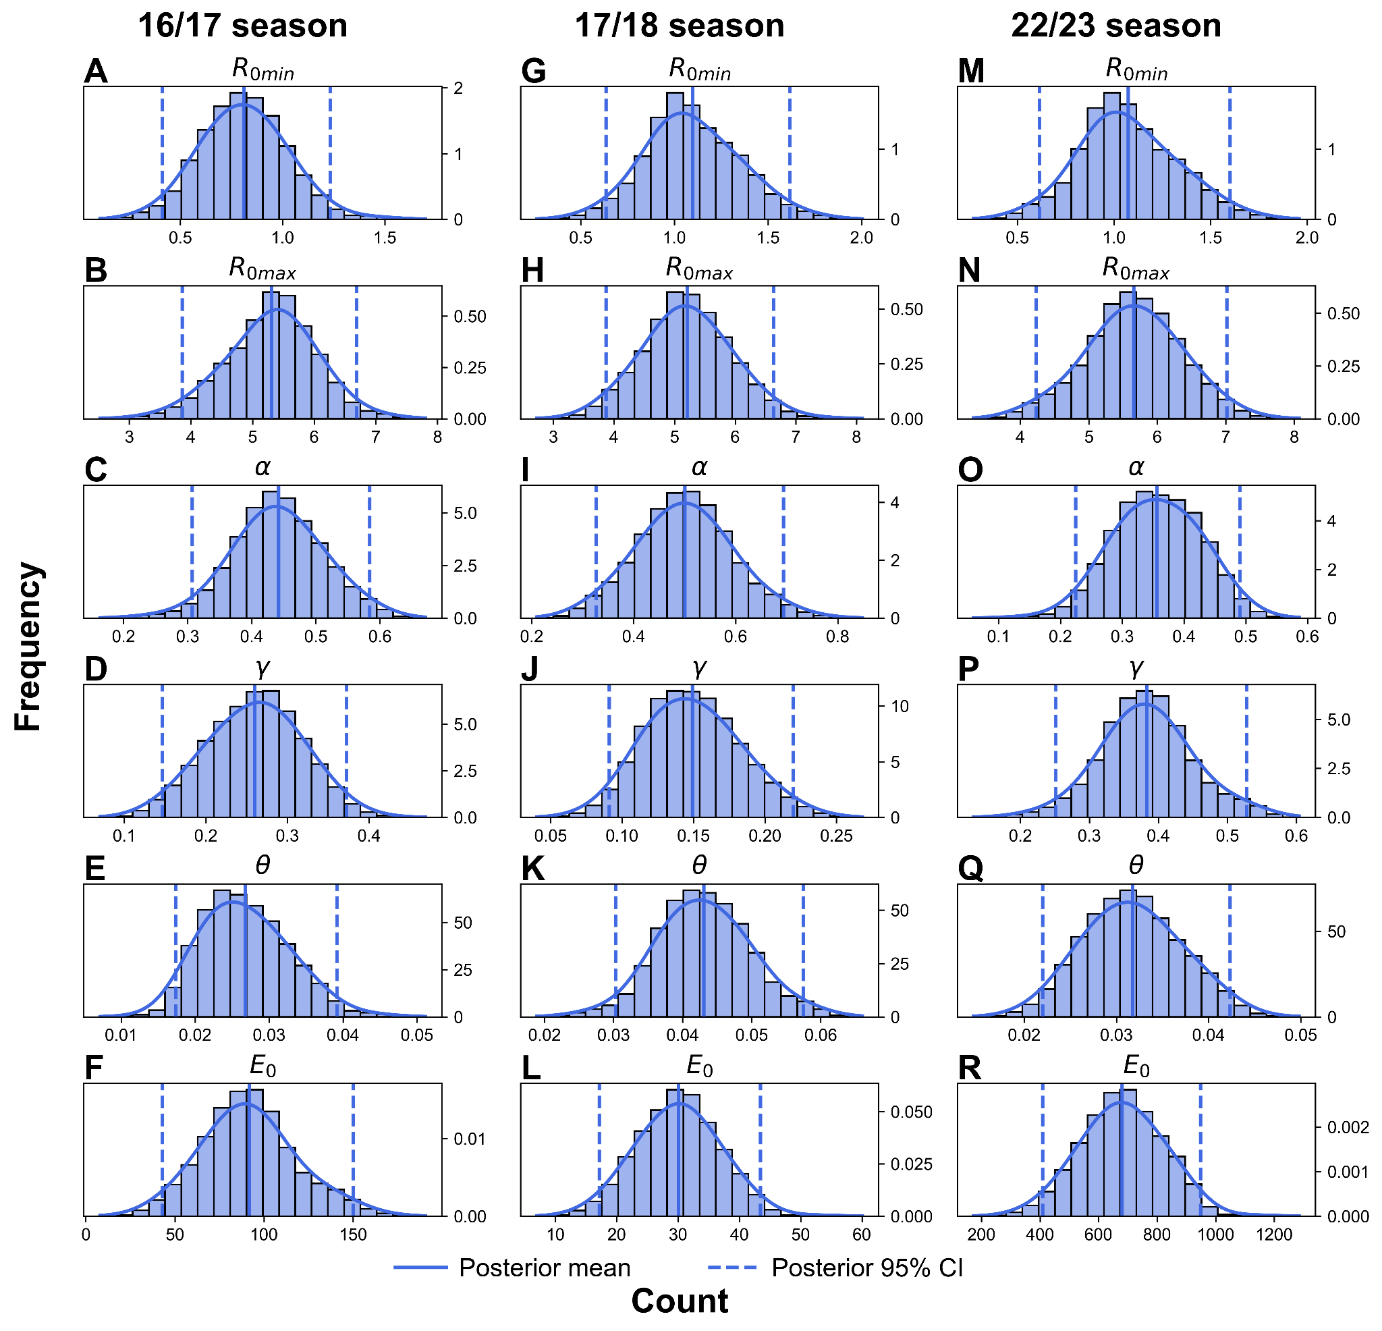


**Figure S8. Posterior distributions of parameters estimated via EnKF in Daegu.**
